# Supplementary material for: Effect of Sprouted Buckwheat on Glycemic Index and Quality of Reconstituted Rice
Source: MDPI journal article supplement (doi:10.3390/foods13081148), 2024-04-10
Supplement: s1 [file s1]

## Supplementary Material

### Preparation process for reconstructed rice containing sprouted buckwheat

Lingtao Kang<sup>a,b,c+</sup>, Jiaqian Luo<sup>a,b,c+</sup>, Zhipeng Su<sup>a,b,c</sup>, Liling Zhou<sup>a,b,c</sup>, Qiutao Xie<sup>b,c\*</sup>, Gaoyang Li<sup>a,b,c\*</sup>

<sup>a</sup>Longping Branch, College of Biology, Hunan University, Changsha 410125, China

<sup>b</sup>Hunan Agricultural Product Processing Institute, Hunan Academy of Agricultural Sciences,  
Changsha 410125, China

<sup>c</sup>Hunan Provincial Key Laboratory for Fruits and Vegetables Storage Processing and Quality Safety,  
Changsha 410125, China

#### Corresponding Authors

\*E-mail addresses: [lgy7102@163.com](mailto:lgy7102@163.com) (G. Y. Li); 258222446@qq.com (Q.T.Xie)

<sup>+</sup>These authors contributed equally to this work

## 21    **1. Experimental methods for formulation design and optimization**

### 22    **1.1 Mixing test design**

23       The design of mixing experiments was carried out by setting constraints using Design-Expert  
24    8.0.6 software. According to the results of the pre-test, due to the viscosity of purple sweet potato (D),  
25    sugar content is high. The content is too high will lead to the product being difficult to form, so its  
26    content percentage is fixed at 10%, wheat flour (A) and sprouted buckwheat flour (B) content  
27    percentage of the range of change are set to  $20\% \leq A \leq 50\%$ . The range of variation of the black rice  
28    flour (C) content percentage is set to  $10\% \leq C \leq 30\%$ .  $A+B+C = 90\%$ , giving a total of 16 recipes. In  
29    this experiment, the percentage of raw materials was used as the independent variable, and the  $\alpha$ -  
30    amylase inhibitory activity, resistant starch content, and sensory score of the product were used as the  
31    response values.

### 32    **1.2 Extruded puffing process and parameters**

33       Extrusion process: Cereal raw materials → Grinding (40 mesh sieve) → Moisture Adjustment  
34    → extrusion-puffing (reconstituted rice) → Microwave-puffing (instant reconstituted rice) → dry →  
35    Refrigerate and reserve.

36       Extrusion-puffing parameters: The raw materials were crushed and sieved and the moisture  
37    content was adjusted to 22%. The raw materials were extruded and expanded using a twin-screw  
38    extruder(LY70, Linyang Machinery, china) with a screw speed of 20.1 HZ, a temperature of 40.5°C in  
39    zone 1, 62.6°C in zone 2, and 68.7°C in zone 3.

40       Microwave-puffing parameters: expansion 1 min.

### 41    **1.3 Determination of $\alpha$ -amylase inhibition rate and resistant starch content and sensory**

## 42 **evaluation**

43       The inhibition rate of  $\alpha$ -amylase was determined by referring to the Peng xi et al. method with  
44 minor modifications [1]. Take 5 g of the sample and add 0.1 mol/L PBS (pH 6.9) and shake well,  
45 centrifuge at 3000 r/min for 10 min, and take the supernatant to be measured. Take 500  $\mu$ L of the  
46 supernatant and add 500  $\mu$ L of the  $\alpha$ -amylase solution, incubate at 37°C for 10 min, then add 500  $\mu$ L  
47 of 1% soluble starch, incubate at 37°C for 10 min, and then add 1 mL of DNS reagent, and terminate  
48 the reaction by boiling water bath for 5 min. Cooled to room temperature and diluted one-fold, the  
49 absorbance was measured at 540 nm using a Microplate reader (synergy H1, BIOTEK, USA). In the  
50 negative group, 500  $\mu$ L of PBS was added to replace the supernatant. In the blank group, 1 mL PBS  
51 was added to replace the supernatant and  $\alpha$ -amylase solution. The inhibition rate of  $\alpha$ -amylase was  
52 calculated according to the following formula: inhibition rate (%) =  $(A_1 - A_2) - (A_3 - A_2) / (A_1 - A_2) \times$   
53 100%. Where:  $A_1$  is the negative group,  $A_2$  is the blank group, and  $A_3$  is the sample group.

54       Resistant starch content was determined according to the method of Goni et al. with minor  
55 modifications [2]. Weigh 200 mg of sample in a 50 mL centrifuge tube, digested by pepsin and cellulase  
56 successively, adjust the pH of the solution to 6.0, add thermostable  $\alpha$ -amylase 1 mL (20 mg/mL),  
57 oscillate at 90 °C for 60 min, adjust the pH of the solution to 4.5 after cooling to room temperature,  
58 add amyloglucosidase 1 mL (20 mg/mL), oscillate at 60 °C for 60 min, and then centrifuge for 5 min  
59 at 8,000 r/min, discard the supernatant and repeat the water washing and centrifugation three times.  
60 To the precipitate, 2 mL of 2 mol/L KOH was added and shaken at room temperature for 30 min. pH  
61 was adjusted to 4.5, 1 mL of amyloglucosidase (20 mg/mL) was added, and the solution was shaken  
62 at 60°C for 60 min in a water bath. After cooling, centrifuge at 8000 r/min for 5 min, pour the

63 supernatant into a 100 mL volumetric flask, then repeat washing the precipitate with distilled water for  
64 3 times, centrifuge, pour it into a volumetric flask, and then fix the volume to 100 mL with distilled  
65 water, shake it well, and then prepare for use. Glucose content was determined by the DNS method  
66 and then converted to the amount of resistant starch. Resistant starch yield was calculated according  
67 to the following formula: Resistant starch yield ( %) = (  $m_1 \times 0.9 \times 100$  ) /  $m_2$ . where  $m_1$  is the mass of  
68 glucose (mg);  $m_2$  is the mass of the sample (mg); 0.9 is the conversion coefficient between glucose  
69 and starch.

70 Sensory evaluation was carried out by a professionally trained 10-member tasting panel on the  
71 samples in four aspects, namely, morphology (25 points), color (20 points), taste (30 points), and flavor  
72 (25 points), respectively, and the specific scoring criteria are shown in **Table S1**.

73 **Table S1** Sensory evaluation criteria

| 74 | Items      | Scoring criteria                                                                     | Point |
|----|------------|--------------------------------------------------------------------------------------|-------|
|    |            | Uniform texture, fine and smooth taste                                               | 16-25 |
| 75 | Morphology | More homogeneous texture, finer and smoother taste                                   | 11-15 |
| 76 |            | Uneven texture and roughness                                                         | 1-10  |
|    |            | Bright and even color, appetizing                                                    | 16-20 |
| 77 | Color      | The color is brighter and more uniform and does not affect the appetite              | 11-15 |
|    |            | Poor color, seriously affecting appetite                                             | 1-10  |
| 78 |            | Harmonized taste with no rawness, aftertaste or bitterness                           | 16-30 |
| 79 | Taste      | The palate is generally harmonious, with a slight rawness, aftertaste and bitterness | 11-15 |
|    |            | Disjointed mouthfeel, with heavy rawness, aftertaste and bitterness                  | 1-10  |
| 80 |            | Strong grain aroma with no undesirable flavors                                       | 16-25 |
| 81 | Flavor     | Has a light grain aroma with no undesirable flavors                                  | 11-15 |
|    |            | Odor or unpleasant taste                                                             | 1-10  |

## 82 83 2. Determination of optimal formulation for reconstituted rice

## 2.1 Results of analysis with $\alpha$ -amylase inhibition as a response value

Statistical analysis, as well as multiple regression fitting of the experimental data for  $\alpha$ -amylase inhibition in **Table S2**, was carried out using Design-Expert 8.0.6 software to obtain the regression equation:

$Y_1 = 78.22A + 53.22B - 11.90C - 180.89AB + 6.80AC + 46.31BC - 690.38A^2BC + 444.60AB^2C + 1718.33ABC^2$ . The results of regression and ANOVA for  $\alpha$ -amylase inhibition are shown in **Table S3**. The linear relationship between the regression model and the equation variables was highly significant, the lack of fit was not significant, and the model was well fitted to the test results.

From the regression equation  $Y_1$ , it can be seen that the response coefficients of the terms A, B, AC, and BC are all positive, indicating that wheat flour and sprouted buckwheat flour extracts as well as wheat flour-black rice flour and sprouted buckwheat flour-black rice flour mixed extracts can promote the effect of  $\alpha$ -amylase inhibition, in which the response coefficient of wheat is larger, which reflects the strength of the three raw materials of  $\alpha$ -amylase inhibition. Combined with **Table S3**, the effect of wheat flour-sprouted buckwheat flour co-action on  $\alpha$ -amylase inhibition was highly significant ( $p < 0.01$ ). The contour plot of the effect of raw material ratios on  $\alpha$ -amylase inhibition rate is shown in **Fig.S1**. When the amount of wheat flour and black rice flour is more, and sprouted buckwheat flour is less, the  $\alpha$ -amylase inhibition rate is about 50%; when the amount of wheat flour is more, and sprouted buckwheat flour and black rice flour is less, the  $\alpha$ -amylase inhibition rate reaches 65%. The three raw materials in the compounding process on the  $\alpha$ -amylase inhibition effect of synergistic effect, in which wheat flour plays a dominant role.

**Table S2** Mixing test design and results

| Test set | A<br>Sprouted<br>buckwheat flour | B<br>wheat flour | C<br>black rice flour | D<br>purple sweet<br>potato flour | R1<br>$\alpha$ -Amylase<br>inhibition rate |
|----------|----------------------------------|------------------|-----------------------|-----------------------------------|--------------------------------------------|
| 1        | 20.000                           | 50.000           | 20.000                | 10.000                            | 43.826 $\pm$ 2.08                          |
| 2        | 30.000                           | 30.000           | 30.000                | 10.000                            | 54.016 $\pm$ 1.54                          |
| 3        | 40.000                           | 20.000           | 30.000                | 10.000                            | 48.877 $\pm$ 0.66                          |
| 4        | 27.500                           | 42.500           | 20.000                | 10.000                            | 44.946 $\pm$ 0.25                          |
| 5        | 50.000                           | 30.000           | 10.000                | 10.000                            | 42.428 $\pm$ 0.54                          |
| 6        | 30.000                           | 50.000           | 10.000                | 10.000                            | 24.094 $\pm$ 1.55                          |
| 7        | 20.000                           | 40.000           | 30.000                | 10.000                            | 31.224 $\pm$ 0.42                          |
| 8        | 35.000                           | 35.000           | 20.000                | 10.000                            | 43.644 $\pm$ 1.69                          |
| 9        | 42.500                           | 32.500           | 15.000                | 10.000                            | 32.098 $\pm$ 1.06                          |
| 10       | 20.000                           | 50.000           | 20.000                | 10.000                            | 47.290 $\pm$ 0.38                          |
| 11       | 40.000                           | 20.000           | 30.000                | 10.000                            | 47.820 $\pm$ 1.14                          |
| 12       | 25.000                           | 50.000           | 15.000                | 10.000                            | 43.512 $\pm$ 1.85                          |
| 13       | 50.000                           | 30.000           | 10.000                | 10.000                            | 33.589 $\pm$ 2.85                          |
| 14       | 20.000                           | 40.000           | 30.000                | 10.000                            | 33.314 $\pm$ 2.19                          |
| 15       | 30.000                           | 50.000           | 10.000                | 10.000                            | 25.892 $\pm$ 1.65                          |
| 16       | 40.000                           | 40.000           | 10.000                | 10.000                            | 21.335 $\pm$ 1.42                          |

105

106

**Table S3** Analysis of variance (ANOVA) of  $\alpha$ -amylase inhibition rate

| Source             | Sum of squares | df | Mean square         | <i>F</i> -ratio | <i>Prob&gt;F</i> |
|--------------------|----------------|----|---------------------|-----------------|------------------|
| Model              | 1398.84        | 8  | 174.85              | 21.68           | 0.0003**         |
| linear mixed model | 490.17         | 2  | 245.09              | 30.39           | 0.0004**         |
| AB                 | 136.14         | 1  | 136.14              | 16.88           | 0.0045**         |
| AC                 | 4.53           | 1  | 4.53                | 0.56            | 0.4782           |
| BC                 | 2.7            | 1  | 2.7                 | 0.34            | 0.5808           |
| A <sup>2</sup> BC  | 22.45          | 1  | 22.45               | 2.78            | 0.1392           |
| AB <sup>2</sup> C  | 12.93          | 1  | 12.93               | 1.60            | 0.2460           |
| ABC <sup>2</sup>   | 235.82         | 1  | 235.82              | 29.24           | 0.0010**         |
| Residual           | 56.46          | 7  | 8.07                |                 |                  |
| Lack of fit        | 7.03           | 2  | 3.52                | 0.36            | 0.7172           |
| Pure error         | 49.43          | 5  | 9.89                |                 |                  |
| $R^2=0.9612$       |                |    | $R^2_{Adj}= 0.9169$ |                 |                  |

107

Note:  $p > 0.05$  is not significant; \*:  $p < 0.05$  is significant; \*\*:  $p < 0.01$  is highly significant, the same below.

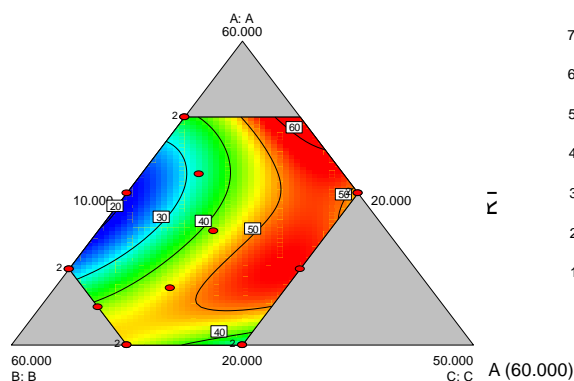

(a) Contour map

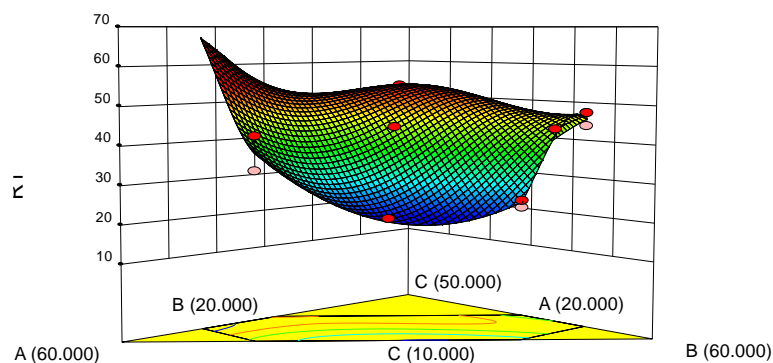

(b) 3D Response surface map

**Fig.S1.** Influence of different proportions of extracts on  $\alpha$ -amylase inhibition rate

## 2.2 Results of analysis with resistant starch content as response value

Statistical analysis as well as multiple regression fitting of the experimental data for resistant starch content in **Table S4** was carried out using Design-Expert 8.0.6 software and regression equations were obtained:

$$Y_2 = -1.28A + 87.61B - 638.67C - 29.38AB + 1360.30AC + 1219.17BC - 1163.68ABC + 183.87AB(A-B) + 720.62AC(A-C) - 1103.64BC(B-C)$$

The results of regression and ANOVA for resistant starch content are shown in **Table S5**. The linear relationship between the regression model and the equation variables was highly significant, and the lack of fit was not significant, indicating that the model was well fitted to the test results.

From the regression equation,  $Y_2$  can be seen, B, AC, and BC response coefficients are positive, indicating that sprouted buckwheat flour content promotes resistant starch content, wheat flour-black rice flour, and buckwheat-black rice interaction can play a role in promoting the content of resistant starch, the size of the contribution of the wheat flour-black rice flour > sprouted buckwheat flour-black rice flour. It showed that sprouted buckwheat flour content plays an important role in resistant starch content, and the combined effect of wheat flour-black rice flour and sprouted buckwheat flour-black

rice flour significantly increased resistant starch content ( $p < 0.01$ ). In addition, according to **Table S5**, three interaction terms were highly significant, indicating that the interaction of the three ingredients could significantly affect the resistant starch content. The contour plot of the effect of composite ingredient ratios on resistant starch content is shown in **Fig.S2**. When sprouted buckwheat flour accounted for a high percentage, wheat flour, and black rice flour accounted for a low percentage, the resistant starch content is around 41%. When the percentage of wheat flour and black rice flour is high and sprouted buckwheat flour is low, the resistant starch content reaches 42%. Three raw materials in the compounding process, sprouted buckwheat flour content, play a dominant role, and the three raw materials compounding have a synergistic effect on the content of resistant starch.

**Table S4** Mixing test design and results

| Test set | A<br>Sprouted<br>buckwheat flour | B<br>wheat flour | C<br>black rice flour | D<br>purple sweet<br>potato flour | R2<br>Resistant starch<br>content |
|----------|----------------------------------|------------------|-----------------------|-----------------------------------|-----------------------------------|
| 1        | 20.000                           | 50.000           | 20.000                | 10.000                            | 30.823±0.65                       |
| 2        | 30.000                           | 30.000           | 30.000                | 10.000                            | 28.223±1.53                       |
| 3        | 40.000                           | 20.000           | 30.000                | 10.000                            | 19.323±1.20                       |
| 4        | 27.500                           | 42.500           | 20.000                | 10.000                            | 24.990±1.38                       |
| 5        | 50.000                           | 30.000           | 10.000                | 10.000                            | 31.531±0.57                       |
| 6        | 30.000                           | 50.000           | 10.000                | 10.000                            | 41.506±1.13                       |
| 7        | 20.000                           | 40.000           | 30.000                | 10.000                            | 28.571±1.58                       |
| 8        | 35.000                           | 35.000           | 20.000                | 10.000                            | 29.147±0.46                       |
| 9        | 42.500                           | 32.500           | 15.000                | 10.000                            | 27.185±0.48                       |
| 10       | 20.000                           | 50.000           | 20.000                | 10.000                            | 31.862±1.88                       |
| 11       | 40.000                           | 20.000           | 30.000                | 10.000                            | 20.801±1.08                       |
| 12       | 25.000                           | 50.000           | 15.000                | 10.000                            | 22.589±0.63                       |
| 13       | 50.000                           | 30.000           | 10.000                | 10.000                            | 33.590±0.47                       |
| 14       | 20.000                           | 40.000           | 30.000                | 10.000                            | 29.662±2.33                       |
| 15       | 30.000                           | 50.000           | 10.000                | 10.000                            | 44.270±2.04                       |
| 16       | 40.000                           | 40.000           | 10.000                | 10.000                            | 35.526±1.27                       |



142

**Table S5** Analysis of variance (ANOVA) of resistant starch content

| Source             | Sum of squares | df | Mean square         | F-ratio | Prob>F     |
|--------------------|----------------|----|---------------------|---------|------------|
| Model              | 664.97         | 9  | 73.89               | 32.7    | 0.0002**   |
| linear mixed model | 356.94         | 2  | 178.47              | 78.99   | < 0.0001** |
| AB                 | 2.75           | 1  | 2.75                | 1.22    | 0.3121     |
| AC                 | 113.03         | 1  | 113.03              | 50.03   | 0.0004**   |
| BC                 | 96.29          | 1  | 96.29               | 42.62   | 0.0006**   |
| ABC                | 112.29         | 1  | 112.29              | 49.7    | 0.0004**   |
| AB(A—B)            | 48.26          | 1  | 48.26               | 21.36   | 0.0036**   |
| AC(A—C)            | 97.45          | 1  | 97.45               | 43.14   | 0.0006**   |
| BC(B—C)            | 142.96         | 1  | 142.96              | 63.28   | 0.0002**   |
| Residual           | 13.56          | 6  | 2.26                |         |            |
| Lack of fit        | 5.39           | 1  | 5.39                | 3.3     | 0.129      |
| Pure error         | 8.17           | 5  | 1.63                |         |            |
| $R^2=0.9800$       |                |    | $R^2_{Adj}= 0.9501$ |         |            |

143

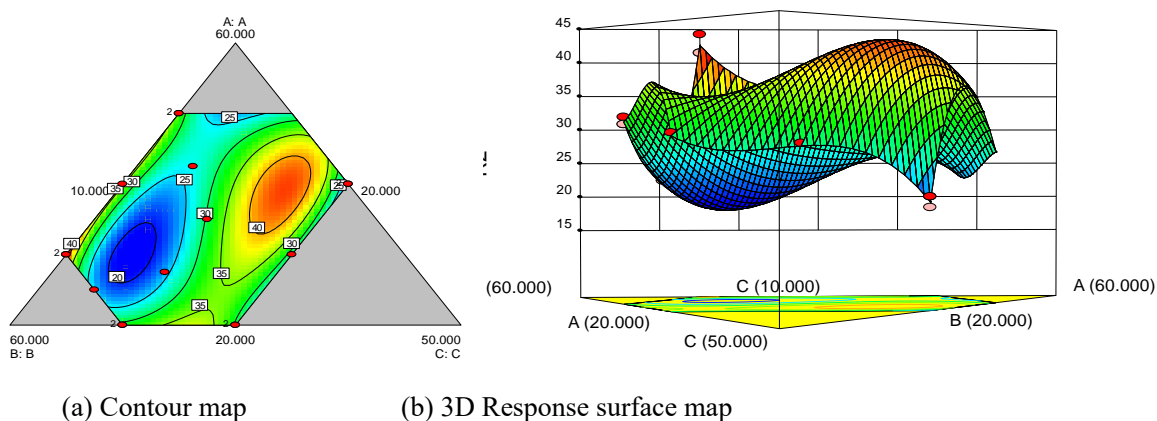

144

(a) Contour map

(b) 3D Response surface map

145

**Fig.S2.** Effects of different ratios of raw material on the content of resistant starch

## 146 2.3 Results of analyses using sensory scores as response values

147

Statistical analysis as well as multiple regression fitting of the experimental data for the sensory

148

scores in **Table S6** was performed using Design-Expert 8.0.6 software to obtain the regression

149

equations:

150

$$Y_3=63.11A+77.73B-11.60C-8.27AB+166.51AC+114.84BC-165.44ABC+39.38AB (A-B)$$

151

$-138.60AC (A-C) -136.42BC (B-C)$  . The results of the regression and ANOVA for sensory

152

scores are shown in **Table S7**, where the linear relationship between the regression model and the

153

variables was highly significant and the lack of fit was not significant, indicating that the model was

154 well fitted to the test results.

155 From the regression equation  $Y_3$ , it can be seen that the response coefficients of A, B, AC, and  
156 BC are all positive, indicating that the use of wheat flour, sprouted buckwheat flour, and a mixture of  
157 wheat flour-black rice flour and sprouted buckwheat flour-black rice flour can play a role in promoting  
158 the sensory scores. The contribution of sprouted buckwheat flour > wheat flour and wheat flour-black  
159 rice flour > sprouted buckwheat flour-black rice flour, respectively. It showed that sprouted buckwheat  
160 flour played an important role, and the combined effect of wheat flour-black rice flour and sprouted  
161 buckwheat flour-black rice flour significantly increased the sensory scores ( $p < 0.01$ ). The contour plot  
162 of the effect of composite ingredient ratios on sensory scores is shown in **Fig.S3**. When more black  
163 rice flour was used, and less wheat flour and sprouted buckwheat flour were used, the sensory score  
164 was higher, at about 79. The sensory score gradually decreased as the amount of black rice flour  
165 decreased.

166 **Table S6** Mixing test design and results

| Test set | A<br>Sprouted<br>buckwheat flour | B<br>wheat flour | C<br>black rice flour | D<br>purple sweet<br>potato flour | R3<br>Sensory score |
|----------|----------------------------------|------------------|-----------------------|-----------------------------------|---------------------|
| 1        | 20.000                           | 50.000           | 20.000                | 10.000                            | 70.000±2.83         |
| 2        | 30.000                           | 30.000           | 30.000                | 10.000                            | 78.900±2.16         |
| 3        | 40.000                           | 20.000           | 30.000                | 10.000                            | 79.600±1.32         |
| 4        | 27.500                           | 42.500           | 20.000                | 10.000                            | 69.500±3.12         |
| 5        | 50.000                           | 30.000           | 10.000                | 10.000                            | 69.500±3.16         |
| 6        | 30.000                           | 50.000           | 10.000                | 10.000                            | 70.200±2.58         |
| 7        | 20.000                           | 40.000           | 30.000                | 10.000                            | 72.800±1.99         |
| 8        | 35.000                           | 35.000           | 20.000                | 10.000                            | 72.600±2.54         |
| 9        | 42.500                           | 32.500           | 15.000                | 10.000                            | 68.300±2.50         |
| 10       | 20.000                           | 50.000           | 20.000                | 10.000                            | 69.700±2.06         |
| 11       | 40.000                           | 20.000           | 30.000                | 10.000                            | 78.400±1.61         |
| 12       | 25.000                           | 50.000           | 15.000                | 10.000                            | 68.500±2.07         |
| 13       | 50.000                           | 30.000           | 10.000                | 10.000                            | 68.400±2.28         |
| 14       | 20.000                           | 40.000           | 30.000                | 10.000                            | 74.100±2.42         |
| 15       | 30.000                           | 50.000           | 10.000                | 10.000                            | 67.200±2.08         |

16 40.000 40.000 10.000 10.000 68.500±3.187

168

**Table S7** Analysis of variance (ANOVA) of sensory score

| Source             | Sum of squares | df | Mean square        | F-ratio | Prob>F     |
|--------------------|----------------|----|--------------------|---------|------------|
| Model              | 240.58         | 9  | 26.73              | 19.86   | 0.0008**   |
| linear mixed model | 209.56         | 2  | 104.78             | 77.85   | < 0.0001** |
| AB                 | 0.22           | 1  | 0.22               | 0.16    | 0.7014     |
| AC                 | 1.69           | 1  | 1.69               | 1.26    | 0.3049     |
| BC                 | 0.85           | 1  | 0.85               | 0.63    | 0.456      |
| ABC                | 1.11           | 1  | 1.11               | 0.83    | 0.3987     |
| AB(A—B)            | 2.22           | 1  | 2.22               | 1.65    | 0.2466     |
| AC(A—C)            | 3.61           | 1  | 3.61               | 2.68    | 0.1528     |
| BC(B—C)            | 2.18           | 1  | 2.18               | 1.62    | 0.2498     |
| Residual           | 8.08           | 6  | 1.35               |         |            |
| Lack of fit        | 1.43           | 1  | 1.43               | 1.07    | 0.3477     |
| Pure error         | 6.65           | 5  | 1.33               |         |            |
| $R^2=0.9675$       |                |    | $R^2_{Adj}=0.9188$ |         |            |

176

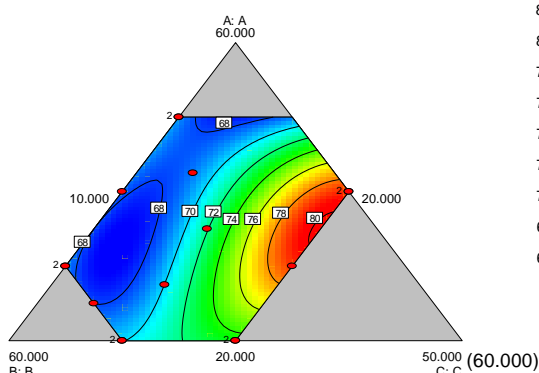

(a) Contour map

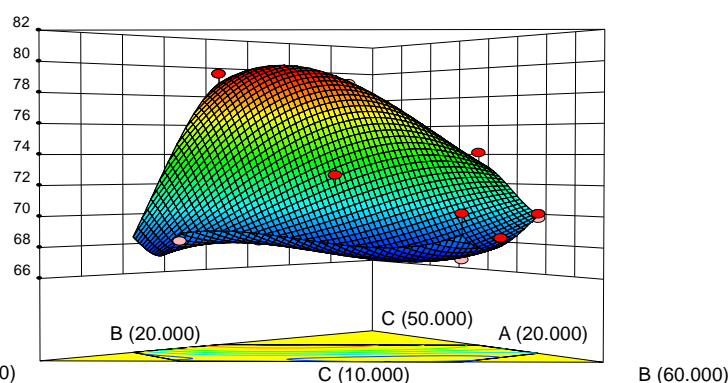

(b) 3D Response surface map

**Fig.S3.** Effects of different ratios of raw material on sensory scores

## 2.4 Analysis results with weighted scores as response values

Statistical analysis as well as multiple regression fitting of the experimental data for the weighted scores in **Table S8** resulted in a regression equation:

$$Y_4 = 45.59A + 67.70B - 265.2C - 80.75AB + 611.88AC + 551.99BC - 545.25ABC + 82.98AB(A-B) - 488.68AC(A-C) - 456.54BC(B-C)$$
The results of the weighted score regression and ANOVA are shown in **Table S9**, the regression model was significant ( $p < 0.05$ ), the lack of fit was not

185 significant, and the model was well fitted to the test results.

186 From the regression equation  $Y_4$ , it can be seen that the response coefficients of A, B, AC, and  
187 BC are all positive, indicating that the use of only wheat flour, sprouted buckwheat flour, and wheat  
188 flour-black rice flour, sprouted buckwheat flour-black rice flour interactively on the weighted scores  
189 have a promotional effect. The contribution of sprouted buckwheat flour > wheat flour and wheat flour-  
190 black rice flour > sprouted buckwheat flour-black rice flour, respectively. It showed that wheat flour  
191 and sprouted buckwheat flour played an important role, and the synergistic effect of wheat flour, black  
192 rice flour, and sprouted buckwheat flour-black rice flour significantly increased the weighted scores ( $p$   
193 < 0.01). The contour plot of the effect of compound ingredient ratios on weighted scores is shown in  
194 **Fig.S4**. The three ingredient compounding acts synergistically on the weighted scores.

195 **Table S8** Mixing test design and results

| Test set | A<br>Sprouted<br>buckwheat flour | B<br>wheat flour | C<br>black rice flour | D<br>purple sweet<br>potato flour | R <sub>4</sub><br>weighted score |
|----------|----------------------------------|------------------|-----------------------|-----------------------------------|----------------------------------|
| 1        | 20.000                           | 50.000           | 20.000                | 10.000                            | 42.358                           |
| 2        | 30.000                           | 30.000           | 30.000                | 10.000                            | 48.676                           |
| 3        | 40.000                           | 20.000           | 30.000                | 10.000                            | 43.200                           |
| 4        | 27.500                           | 42.500           | 20.000                | 10.000                            | 41.874                           |
| 5        | 50.000                           | 30.000           | 10.000                | 10.000                            | 43.484                           |
| 6        | 30.000                           | 50.000           | 10.000                | 10.000                            | 37.222                           |
| 7        | 20.000                           | 40.000           | 30.000                | 10.000                            | 38.478                           |
| 8        | 35.000                           | 35.000           | 20.000                | 10.000                            | 43.636                           |
| 9        | 42.500                           | 32.500           | 15.000                | 10.000                            | 37.373                           |
| 10       | 20.000                           | 50.000           | 20.000                | 10.000                            | 48.007                           |
| 11       | 40.000                           | 20.000           | 30.000                | 10.000                            | 43.128                           |
| 12       | 25.000                           | 50.000           | 15.000                | 10.000                            | 39.020                           |
| 13       | 50.000                           | 30.000           | 10.000                | 10.000                            | 44.018                           |
| 14       | 20.000                           | 40.000           | 30.000                | 10.000                            | 40.011                           |
| 15       | 30.000                           | 50.000           | 10.000                | 10.000                            | 41.305                           |
| 16       | 40.000                           | 40.000           | 10.000                | 10.000                            | 36.445                           |

196

197

198

**Table S9** Analysis of variance (ANOVA) of weighted score

| Source             | Sum of squares | df | Mean square        | F-ratio | Prob>F  |
|--------------------|----------------|----|--------------------|---------|---------|
| Model              | 166.78         | 9  | 18.53              | 4.34    | 0.044*  |
| linear mixed model | 24.61          | 2  | 12.31              | 2.88    | 0.1327  |
| AB                 | 20.78          | 1  | 20.78              | 4.87    | 0.0695  |
| AC                 | 22.87          | 1  | 22.87              | 5.36    | 0.0599  |
| BC                 | 19.74          | 1  | 19.74              | 4.62    | 0.0751  |
| ABC                | 12.06          | 1  | 12.06              | 2.82    | 0.1438  |
| AB(A—B)            | 9.85           | 1  | 9.85               | 2.31    | 0.1797  |
| AC(A—C)            | 44.81          | 1  | 44.81              | 10.5    | 0.0177* |
| BC(B—C)            | 24.46          | 1  | 24.46              | 5.73    | 0.0538  |
| Residual           | 25.62          | 6  | 4.27               |         |         |
| Lack of fit        | 0.010          | 1  | 0.010              | 0.002   | 0.9665  |
| Pure error         | 25.61          | 5  | 5.12               |         |         |
| $R^2=0.8668$       |                |    | $R^2_{Adj}=0.6671$ |         |         |

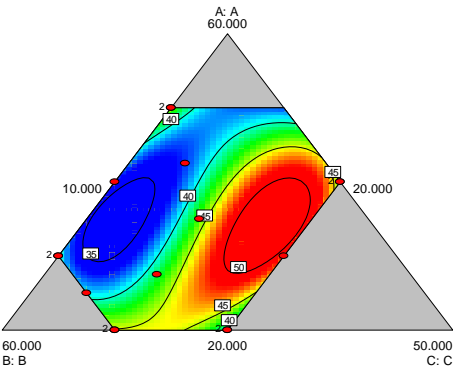

(a) Contour map

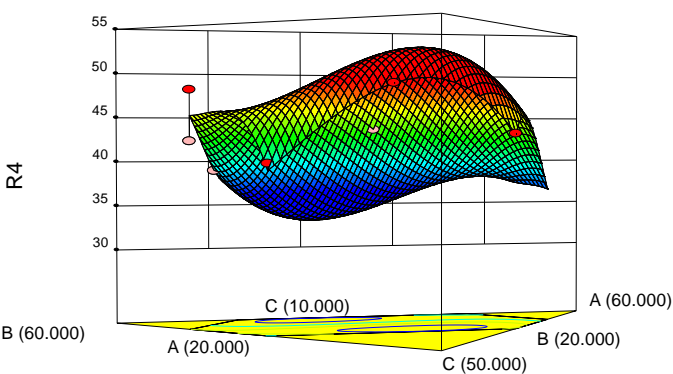

(b) 3D Response surface map

**Fig.S4.** Effects of different ratios of raw material on weighted scores

219  
220

Table S10 Flavor ingredient information of rice products

| Class        | Name                                                   | Rice Content<br>(µg/g) | Instant rice<br>Content (µg/g) | Reconstituted rice<br>Content (µg/g) | Instant reconstituted rice<br>Content (µg/g) |
|--------------|--------------------------------------------------------|------------------------|--------------------------------|--------------------------------------|----------------------------------------------|
| Alkanes      | Decane                                                 | 6.03±0.001             | 6.03±0.000                     | -                                    | 6.03±0.000                                   |
|              | Eicosane                                               | 39.17±0.000            | -                              | 39.179±0.004                         | 39.2165±0.04                                 |
|              | Methylcyclooctane                                      | -                      | 3.64±0.000                     | -                                    | -                                            |
|              | Dodecane                                               | -                      | -                              | 11.94±0.001                          | 11.95±0.01                                   |
|              | n-Tetradecane                                          | -                      | -                              | 18.52±0.002                          | 18.54±0.02                                   |
|              | n-Pentadecane                                          | -                      | -                              | 21.98±0.002                          | 22.00±0.02                                   |
|              | n-Hexadecane                                           | -                      | -                              | 25.46±0.003                          | 25.50±0.04                                   |
|              | Cyclopentadecan                                        | -                      | -                              | -                                    | 21.43±0.000                                  |
|              | Nonadecane                                             | -                      | -                              | -                                    | 35.71±0.000                                  |
|              | Undecane                                               | -                      | -                              | -                                    | 0.48±0.014                                   |
|              | Phytane                                                | -                      | -                              | 39.19±0.006                          | -                                            |
|              | Cycloheptane                                           | -                      | -                              | 1.04±0.000                           | -                                            |
|              | n-Tridecane                                            | -                      | -                              | 15.18±0.002                          | 15.19±0.016                                  |
|              | Nonanal                                                | 6.27±0.001             | 6.27±0.000                     | -                                    | 6.27±0.007                                   |
|              | Hexanal                                                | 1.19±0.002             | 1.19±0.000                     | -                                    | 1.19±0.001                                   |
| Aldehydes    | 2,4-Nonadienal                                         | -                      | 14.94±0.000                    | 5.52±0.000                           | 14.94±0.000                                  |
|              | (E)-Hept-2-enal                                        | -                      | 2.04±0.001                     | 2.05±0.001                           | -                                            |
|              | n-Octanal                                              | -                      | 3.92±0.000                     | 3.92±0.001                           | 3.92±0.000                                   |
|              | trans-2-Nonenal                                        | -                      | 5.87±0.000                     | -                                    | -                                            |
|              | (E)-2-Octenal                                          | -                      | -                              | 20.55±0.000                          | 20.57±0.009                                  |
|              | (Z)-2-Nonenal                                          | -                      | -                              | 5.87±0.001                           | -                                            |
|              | Decanal                                                | -                      | -                              | 8.81±0.001                           | -                                            |
|              | 2-trans-Decenal                                        | -                      | -                              | 3.57±0.000                           | 3.58±0.003                                   |
|              | Heptaldehyde                                           | -                      | -                              | -                                    | 2.34±0.000                                   |
|              | Phenylacetaldehyde                                     | -                      | -                              | -                                    | 2.05±0.003                                   |
|              | 2,4-Decadienal                                         | -                      | -                              | 7.86±0.006                           | 7.87±0.009                                   |
|              | trans-2,4-Decadienal                                   | -                      | -                              | 8.34±0.001                           | 8.34±0.000                                   |
|              | 2-Methyl-1,2,3,4-Tetrahydronaphthalene                 | -                      | -                              | 6.81±0.001                           | -                                            |
|              | 1,5-Dimethyl-1,2,3,4-tetrahydro-naphthalin             | -                      | -                              | 9.67±0.000                           | 9.69±0.02                                    |
|              | 2,6-Dimethylnaphthalene                                | -                      | -                              | 8.92±0.000                           | -                                            |
| Naphthalenes | 1,5,7-Trimethyl-1,2,3,4-tetrahydronaphthalene          | -                      | -                              | 12.829±0.001                         | -                                            |
|              | 1,2,3,4-Tetrahydro-4-isopropyl-1,6-dimethylnaphthalene | -                      | -                              | 19.4±0.000                           | -                                            |
|              | 2,3,5-Trimethylnaphthylene                             | -                      | -                              | 11.96±0.000                          | 11.98±0.019                                  |
|              | 6-Ethyl-1,2,3,4-tetrahydronaphthalene                  | -                      | -                              | 12.42±2.76                           | -                                            |
|              | 2,5,8-Trimethyl-1,2,3,4-tetrahydronaphthalene          | -                      | -                              | 12.83±0.002                          | -                                            |
|              | 5-Methyltetralin                                       | -                      | -                              | 6.81±0.001                           | -                                            |
|              | 2-Methylnaphthalene                                    | -                      | -                              | 6.05±0.000                           | 6.06±0.01                                    |
|              | 1,4-dimethyl-1,2,3,4-tetrahydronaphthalene             | -                      | -                              | 9.68±0.000                           | 9.67±0.001                                   |

221  
222

Table S10 *Cont 1.*

| Class             | Name                                | Rice Content<br>(µg/g) | Instant rice<br>Content (µg/g) | Reconstituted rice<br>Content (µg/g) | Instant reconstituted rice<br>Content (µg/g) |
|-------------------|-------------------------------------|------------------------|--------------------------------|--------------------------------------|----------------------------------------------|
| Alcohols          | N-methylphenylethanolamine          | 7.84±0.000             | -                              | -                                    | -                                            |
|                   | α-Pinitol                           | -                      | -                              | 8.43±0.005                           | -                                            |
|                   | Spathulenol                         | -                      | -                              | 23.86±0.003                          | -                                            |
|                   | Isophytol                           | -                      | -                              | 42.65±0.007                          | -                                            |
|                   | Dibutyl Phthalate                   | -                      | -                              | 38.09±0.00                           | 38.15±0.06                                   |
| Esters            | Methyl linoleate                    | -                      | -                              | 42.16±0.004                          | 42.22±0.07                                   |
|                   | l-ascorbyl dipalmitate              | -                      | -                              | 69.77±0.000                          | -                                            |
|                   | Methyl hexadecanoate                | -                      | -                              | -                                    | 36.23±0.000                                  |
|                   | Methyl oleate                       | -                      | -                              | -                                    | 2.96±0.07                                    |
| Olefin            | Cinene                              | 4.93±0.001             | -                              | -                                    | 4.94±0.008                                   |
|                   | D-Limonene                          | 4.94±0.008             | 4.94±0.000                     | 4.94±0.001                           | -                                            |
|                   | Terpinene                           | -                      | -                              | 5.00±0.001                           | -                                            |
|                   | 3-Octen-2-one                       | -                      | 3.57±0.000                     | -                                    | -                                            |
| Ketones           | 6,10,14-Trimethyl-2-pentadecanone   | -                      | -                              | 35.70±0.000                          | 35.76±0.06                                   |
|                   | 3-Nonen-2-one                       | -                      | -                              | 5.87±0.001                           | 5.88±0.006                                   |
|                   | Palmitic acid                       | -                      | -                              | 32.74±0.03                           | 32.77±0.003                                  |
| Acids             | Stearic acid                        | -                      | -                              | 39.69±0.000                          | 39.74±0.04                                   |
|                   | Oleic acid                          | -                      | -                              | -                                    | 42.68±0.000                                  |
| Benzenes          | 1-isopropyl-2-methylbenzene         | -                      | -                              | 5.09±0.39                            | 4.70±0.000                                   |
|                   | o-Xylene                            | -                      | -                              | -                                    | 1.60±0.001                                   |
| Indenes           | 1,2-Dimethyl-2,3-dihydro-1H-indene  | -                      | -                              | 6.8±0.001                            | -                                            |
|                   | 1,3,3-Trimethyl-1,2- dihydro-indene | -                      | -                              | 9.66±0.001                           | -                                            |
| Haloalkane        | Dichloromethane                     | -                      | -                              | -                                    | 39.13±0.001                                  |
| Pyrroles          | 1-(Phenylsulfonyl)Pyrrole           | -                      | -                              | 5.87±0.002                           | 5.88±0.02                                    |
| Sulfur-containing | Di-tert-dodecyl disulfide           | -                      | -                              | 62.61±0.007                          | -                                            |
| Ethers            | Vinyl isopropyl ether               | -                      | -                              | -                                    | 0.57±0.006                                   |
| Furans            | 2-Pentylfuran                       | -                      | 5.51±0.000                     | 5.51±0.000                           | 5.52±0.006                                   |
| Pyrazines         | 2-Methylpyrazine                    | -                      | -                              | -                                    | 0.81±0.001                                   |
| Others            | cedrol                              | 24.37±0.004            | -                              | -                                    | -                                            |
|                   | 4,6,8-trimethylazulene              | -                      | -                              | 11.96±0.000                          | 11.97±0.006                                  |

227 **References:**

- 228 [1] Peng, X.;Liu, K.;Hu, X.;Gong, D.;Zhang, G. Hesperetin-Cu(II) complex as potential  $\alpha$ -  
229 amylase and  $\alpha$ -glucosidase inhibitor: Inhibition mechanism and molecular docking. *Spectrochimica*  
230 *Acta Part A: Molecular and Biomolecular Spectroscopy* **2023**,290,  
231 122301.<http://10.1016/j.saa.2022.122301>  
232 [2] Goñi, I.;García-Diz, L.;Mañas, E.;Saura-Calixto, F. Analysis of resistant starch: a method  
233 for foods and food products. *Food Chemistry* **1996**,56, 445-449

234
